# Supplementary material for: The diversity of ice algal communities on the Greenland Ice Sheet as revealed by oligotyping
Source: PubMed Central journal article supplement (PMC5885011; doi:10.1099/mgen.0.000159), 2018-03-16

## **Supplementary material**

### **The diversity of ice algal communities on the Greenland Ice Sheet as revealed by oligotyping**

Supplementary tables: 9

Supplementary figures: 2

**Supplementary Table 1:** Number of 18S rRNA sequences before and after quality filtering, as well as the number and proportion (%) of sequences assigned to algal taxa (the remaining sequences were mostly assigned to Fungi as well as Alveolata, Rhizaria, etc.; data not shown).

| <b>Sample</b>     | <b>Site</b> | <b>No. of sequences before quality filtering</b> | <b>No. of sequences after quality filtering</b> | <b>No. and % of sequences assigned to algae</b> |
|-------------------|-------------|--------------------------------------------------|-------------------------------------------------|-------------------------------------------------|
| <b>GrIS16_1</b>   | 1a          | 146099                                           | 144073                                          | 693 (0.5%)                                      |
| <b>GrIS16_22</b>  | 1b          | 243230                                           | 240351                                          | 173475 (72.2%)                                  |
| <b>GrIS16_2</b>   | 2           | 275392                                           | 277644                                          | 2771811 (97.9%)                                 |
| <b>GrIS16_9</b>   | 2           | 250717                                           | 248118                                          | 185536 (74.8%)                                  |
| <b>GrIS16_3</b>   | 3           | 295439                                           | 291935                                          | 187219 (64.1%)                                  |
| <b>GrIS16_4</b>   | 3           | 264845                                           | 261526                                          | 165560 (63.3%)                                  |
| <b>GrIS16_10</b>  | 3           | 230620                                           | 227867                                          | 143220 (62.9%)                                  |
| <b>GrIS16_11</b>  | 3           | 270128                                           | 266856                                          | 158082 (59.2%)                                  |
| <b>GrIS16_air</b> | base camp   | 107074                                           | 106643                                          | 94889 (89.0%)                                   |
| <b>GrIS16_5</b>   | base camp   | 189871                                           | 187632                                          | 116807 (62.3%)                                  |
| <b>GrIS16_6</b>   | base camp   | 249045                                           | 246194                                          | 161330 (65.5%)                                  |
| <b>GrIS16_7</b>   | base camp   | 251583                                           | 248691                                          | 169012 (68.0%)                                  |
| <b>GrIS16_8</b>   | base camp   | 208418                                           | 206044                                          | 129523 (62.9%)                                  |
| <b>GrIS16_12</b>  | base camp   | 319713                                           | 315965                                          | 193428 (61.2%)                                  |
| <b>GrIS16_13</b>  | base camp   | 404161                                           | 399334                                          | 242681 (60.8%)                                  |
| <b>GrIS16_14</b>  | base camp   | 285202                                           | 281855                                          | 106056 (37.6%)                                  |
| <b>GrIS16_16</b>  | base camp   | 303049                                           | 299676                                          | 253856 (84.7%)                                  |
| <b>GrIS16_17</b>  | base camp   | 211482                                           | 209216                                          | 140781 (67.3%)                                  |
| <b>GrIS16_18</b>  | base camp   | 182810                                           | 180638                                          | 102310 (56.6%)                                  |
| <b>GrIS16_19</b>  | base camp   | 219933                                           | 217536                                          | 170931 (78.6%)                                  |
| <b>GrIS16_27</b>  | base camp   | 234299                                           | 231674                                          | 193901 (83.7%)                                  |
| <b>Total</b>      |             | 5143110                                          | 5089468                                         | 3361101 (66.0%)                                 |

**Supplementary Table 2:** Parameters used for the oligotyping analyses of the most abundant taxa in the GrIS samples.

|                                                      | <b>Individual sequences analysed</b> | <b>Number of entropy locations</b> | <b>Base locations</b>             | <b>Min % abundance of oligotype in at least one sample</b> | <b>Min substantive abundance of an oligotype</b> | <b>No. of oligotypes</b> | <b>Total purity score [%]</b> |
|------------------------------------------------------|--------------------------------------|------------------------------------|-----------------------------------|------------------------------------------------------------|--------------------------------------------------|--------------------------|-------------------------------|
| <b>Ancydonema nordenskiöldii AF514397</b>            | 3,102,396                            | 1                                  | 133                               | 1                                                          | 50                                               | 2                        | 99                            |
| <b>Raphidonema sempervirens AJ309939</b>             | 139,646                              | 8                                  | 66, 81, 82, 83, 96, 103, 104, 149 | 1                                                          | 50                                               | 6                        | 93                            |
| <b>Uncultured Chlamydomonadaceae HW0117 GU117575</b> | 34,533                               | 7                                  | 159, 170, 171, 192, 195, 279, 289 | 1                                                          | 10                                               | 8                        | 85                            |
| <b>Uncultured Chlamydomonadaceae DR1P27 GU117577</b> | 31,592                               | 7                                  | 67, 87, 103, 134, 265, 280, 290   | 1                                                          | 10                                               | 14                       | 41                            |

**Supplementary Table 3:** Algal community composition comprising the 8 most abundant taxa. Values are reported in % of overall relative abundance inferred from sequence frequency and clustering of OTUs at 99% similarity. Table shows taxa with >0.1% relative abundance.

| Taxon                                            | Site 1a     | Site 1b      | Site 2      |             | Site 3      |             |              |              |
|--------------------------------------------------|-------------|--------------|-------------|-------------|-------------|-------------|--------------|--------------|
|                                                  | GrlS16<br>1 | GrlS16<br>22 | GrlS16<br>2 | GrlS16<br>9 | GrlS16<br>3 | GrlS16<br>4 | GrlS16<br>10 | GrlS16<br>11 |
| Ancylonema nordenskiöldii AF514397               | 3.4         | <b>98.6</b>  | <b>99.7</b> | <b>99.6</b> | <b>86</b>   | <b>97.2</b> | <b>77.3</b>  | <b>85.3</b>  |
| Raphidonema sempervirens AJ309939                | 0.3         | 0            | 0.2         | 0.1         | 11.8        | 0.2         | 21.7         | 0            |
| Hydrurus foetidus FM955256                       | <b>96.0</b> | 0            | 0           | 0           | 0           | 0           | 0            | 0            |
| Uncultured Chlamydomonadaceae HW0117<br>GU117575 | 0           | 1.3          | 0.1         | 0.2         | 0.1         | 0.6         | 0.2          | 1.6          |
| Uncultured Chlamydomonadaceae<br>DR1P27GU117577  | 0           | 0            | 0.1         | 0           | 1.2         | 1.7         | 0.8          | 12.3         |
| Chloromonas polyptera JQ790556                   | 0           | 0            | 0           | 0           | 0           | 0.1         | 0            | 0.6          |
| Uncultured Chlorophyceae                         | 0.2         | 0            | 0           | 0           | 0.6         | 0           | 0            | 0            |
| Chloromonas cf. alpina HQ404865                  | 0           | 0            | 0           | 0           | 0           | 0.1         | 0            | 0.2          |

**Supplementary Table 3** continued.

| Taxon                                            | Base camp     |             |             |             |             |              |              |              |              |              |              |              |              |
|--------------------------------------------------|---------------|-------------|-------------|-------------|-------------|--------------|--------------|--------------|--------------|--------------|--------------|--------------|--------------|
|                                                  | GrlS16<br>air | GrlS16<br>5 | GrlS16<br>6 | GrlS16<br>7 | GrlS16<br>8 | GrlS16<br>12 | GrlS16<br>13 | GrlS16<br>14 | GrlS16<br>16 | GrlS16<br>17 | GrlS16<br>18 | GrlS16<br>19 | GrlS16<br>27 |
| Ancylonema nordenskiöldii AF514397               | <b>99.2</b>   | <b>92.7</b> | <b>93.5</b> | <b>94.2</b> | <b>92.2</b> | <b>99.5</b>  | <b>88</b>    | <b>66</b>    | <b>98.4</b>  | <b>95.9</b>  | <b>66.9</b>  | <b>94</b>    | <b>99.2</b>  |
| Raphidonema sempervirens AJ309939                | 0             | 4.1         | 3.3         | 2.9         | 3.5         | 0.3          | 8.5          | <b>24.3</b>  | 1.1          | 1.7          | 4            | 5.7          | 0            |
| Hydrurus foetidus FM955256                       | 0             | 0           | 0           | 0           | 0           | 0            | 0.5          | 0            | 0            | 0            | 0            | 0            | 0            |
| Uncultured Chlamydomonadaceae HW0117<br>GU117575 | 0.8           | 2.3         | 1.9         | 1.7         | 3.5         | 0.1          | 2.5          | 0.6          | 0.5          | 2.2          | 0.5          | 0.3          | 0            |
| Uncultured Chlamydomonadaceae DR1P27<br>GU117577 | 0             | 0.2         | 0.1         | 0.1         | 0.2         | 0            | 0.5          | 2            | 0            | 0            | 0.5          | 0            | 0            |
| Chloromonas polyptera JQ790556                   | 0             | 0           | 0           | 0           | 0           | 0            | 0            | 0            | 0            | 0            | <b>19.8</b>  | 0            | 0            |
| Uncultured Chlorophyceae                         | 0             | 0.2         | 0.5         | 0.4         | 0.2         | 0            | 0            | 4.1          | 0            | 0            | 0            | 0            | 0            |
| Chloromonas cf. alpina HQ404865                  | 0             | 0           | 0           | 0           | 0           | 0            | 0            | 0            | 0            | 0            | 4.0          | 0            | 0            |

**Supplementary Table 4:** Table shows full algal community composition in % of overall relative abundance inferred from sequence frequency and clustering of OTUs at 99% similarity.

| Taxon                                                                | GrIS16<br>1 | GrIS16<br>22 | GrIS16<br>2 | GrIS16<br>9 | GrIS16<br>3 | GrIS16<br>4 | GrIS16<br>10 | GrIS16<br>11 | GrIS16<br>air | GrIS16<br>5 | GrIS16<br>6 | GrIS16<br>7 | GrIS16<br>8 | GrIS16<br>12 | GrIS16<br>13 | GrIS16<br>14 | GrIS16<br>16 | GrIS16<br>17 | GrIS16<br>18 | GrIS16<br>19 | GrIS16<br>21 | GrIS16<br>27 |
|----------------------------------------------------------------------|-------------|--------------|-------------|-------------|-------------|-------------|--------------|--------------|---------------|-------------|-------------|-------------|-------------|--------------|--------------|--------------|--------------|--------------|--------------|--------------|--------------|--------------|
| <i>Ancylonema nordenskiöldii</i>                                     | 2.91        | 98.48        | 98.85       | 99.08       | 84.62       | 96.68       | 76.15        | 84.22        | 88.05         | 91.96       | 93.06       | 93.91       | 91.48       | 99.39        | 87.27        | 64.71        | 98.09        | 95.23        | 63.84        | 93.96        | 76.87        | 99.12        |
| <i>Botrydiopsis callosa</i>                                          | 0           | 0            | 0           | 0           | 0           | 0           | 0            | 0            | 0             | 0           | 0           | 0           | 0           | 0            | 0            | 0            | 0            | 0            | 0.44         | 0            | 0            | 0            |
| <i>Botrydiopsis constricta</i>                                       | 0           | 0            | 0.2         | 0.01        | 0.08        | 0           | 0.28         | 0.01         | 0             | 0           | 0           | 0           | 0           | 0.01         | 0.01         | 0.08         | 0            | 0            | 4.17         | 0            | 0.2          | 0            |
| Chlamydomonadaceae<br>sp CCCryo 086a-99<br>GU117586                  | 0           | 0            | 0.01        | 0           | 0.09        | 0           | 0.04         | 0            | 0             | 0.01        | 0.01        | 0.01        | 0.01        | 0            | 0            | 0.05         | 0            | 0            | 0            | 0            | 0            | 0            |
| <i>Chlamydomonas</i> cf<br><i>proboscigera</i> CCCryo<br>217-05      | 0           | 0            | 0           | 0           | 0           | 0           | 0            | 0            | 0             | 0           | 0           | 0           | 0           | 0            | 0.14         | 0.01         | 0            | 0.01         | 0.02         | 0            | 0            | 0            |
| <i>Chlorellidium tetrabotrys</i>                                     | 0           | 0            | 0           | 0           | 0           | 0           | 0            | 0            | 0             | 0           | 0           | 0           | 0           | 0            | 0            | 0            | 0            | 0            | 0            | 0            | 0            | 0            |
| <i>Chlorococcalean</i> sp<br>AF514412                                | 0           | 0            | 0           | 0           | 0           | 0           | 0            | 0            | 0             | 0           | 0           | 0           | 0           | 0            | 0            | 0            | 0            | 0            | 0            | 0            | 0            | 0            |
| <i>Chloridium saccharophilum</i>                                     | 0           | 0            | 0           | 0           | 0           | 0           | 0            | 0            | 0             | 0           | 0           | 0           | 0           | 0            | 0            | 0            | 0            | 0            | 1.94         | 0            | 0            | 0            |
| <i>Chloromonas</i> cf<br><i>alpina</i> CCCryo 033-99                 | 0           | 0            | 0           | 0.03        | 0.03        | 0.12        | 0            | 0.19         | 0             | 0           | 0           | 0           | 0           | 0            | 0            | 0            | 0            | 0.01         | 3.87         | 0            | 0            | 0            |
| <i>Chloromonas</i> cf<br><i>insignis</i> CCCryo 090-99<br>GU117585   | 0           | 0            | 0.17        | 0           | 0.03        | 0           | 0.01         | 0            | 0             | 0           | 0           | 0           | 0           | 0            | 0.01         | 0            | 0            | 0            | 0            | 0            | 0            | 0            |
| <i>Chloromonas</i> cf<br><i>rostafinskii</i> CCCryo<br>025-99        | 0           | 0            | 0           | 0           | 0           | 0           | 0            | 0            | 0             | 0           | 0           | 0           | 0           | 0            | 0            | 0            | 0            | 0            | 0            | 0            | 0            | 0            |
| <i>Chloromonas</i> cf<br><i>schussnigii</i> CCCryo<br>082-99GU117584 | 0           | 0            | 0.01        | 0           | 0           | 0           | 0            | 0            | 0             | 0           | 0           | 0           | 0           | 0            | 0            | 0            | 0            | 0            | 0            | 0            | 0            | 0            |
| <i>Chloromonas nivalis</i><br>CCCryo 005-99<br>AF514409              | 0           | 0            | 0           | 0           | 0           | 0           | 0            | 0            | 0             | 0           | 0           | 0           | 0           | 0            | 0            | 0            | 0            | 0            | 0            | 0            | 0            | 0            |
| <i>Chloromonas nivalis</i> AF517088                                  | 0           | 0            | 0           | 0           | 0           | 0           | 0            | 0            | 0             | 0           | 0           | 0           | 0           | 0            | 0            | 0            | 0            | 0            | 0.03         | 0            | 0            | 0            |
| <i>Chloromonas pichincae</i>                                         | 0           | 0            | 0           | 0           | 0           | 0           | 0            | 0            | 0             | 0           | 0           | 0           | 0           | 0            | 0            | 0            | 0            | 0            | 0.02         | 0            | 0            | 0            |
| <i>Chloromonas polyptera</i> JQ790556\                               | 0           | 0.01         | 0           | 0           | 0           | 0.08        | 0.01         | 0.64         | 0.01          | 0           | 0           | 0           | 0           | 0.01         | 0.02         | 0.01         | 0.02         | 0.01         | 19.07        | 0            | 0.01         | 0            |
| <i>Chloromonas spec</i><br>CCCryo 273-06                             | 0           | 0            | 0.03        | 0           | 0           | 0           | 0            | 0            | 0             | 0           | 0           | 0           | 0           | 0            | 0.02         | 0            | 0            | 0            | 0            | 0            | 0            | 0            |
| <i>Chloromonas tughillensis</i>                                      | 0           | 0            | 0           | 0           | 0           | 0           | 0            | 0            | 0             | 0           | 0           | 0           | 0           | 0            | 0            | 0            | 0            | 0            | 0            | 0            | 0            | 0            |
| <i>Chloromonas tughillensis</i> UTEX SNO<br>88                       | 0           | 0            | 0           | 0           | 0           | 0           | 0            | 0            | 0             | 0           | 0           | 0           | 0           | 0            | 0            | 0            | 0            | 0            | 0.11         | 0            | 0            | 0            |
| <i>Chloromonas typhlos</i><br>SAG2686                                | 0           | 0            | 0           | 0           | 0           | 0           | 0            | 0            | 0             | 0           | 0           | 0           | 0           | 0            | 0            | 0            | 0            | 0            | 0            | 0            | 0            | 0            |
| <i>Chrysophyceae</i> sp. I76                                         | 0           | 0            | 0           | 0           | 0           | 0           | 0            | 0            | 0             | 0           | 0           | 0           | 0.01        | 0            | 0            | 0            | 0            | 0            | 0            | 0            | 0            | 0.02         |
| <i>Coccomyxa pringsheimii</i>                                        | 0           | 0            | 0           | 0           | 0           | 0           | 0            | 0            | 0             | 0           | 0           | 0           | 0           | 0            | 0            | 0            | 0            | 0            | 0            | 0            | 0            | 0            |
| <i>Coccomyxa</i> sp. Brodo                                           | 0           | 0            | 0           | 0           | 0           | 0           | 0            | 0            | 0             | 0           | 0           | 0           | 0           | 0            | 0            | 0            | 0            | 0            | 0            | 0            | 0            | 0            |

|                                                       |       |      |      |      |      |      |      |      |      |      |      |      |      |      |      |      |      |      |      |      |      |      |
|-------------------------------------------------------|-------|------|------|------|------|------|------|------|------|------|------|------|------|------|------|------|------|------|------|------|------|------|
| <i>Coenocystis inconstans</i>                         | 0     | 0    | 0    | 0    | 0.02 | 0.01 | 0.03 | 0.04 | 0    | 0.01 | 0    | 0    | 0.01 | 0    | 0.02 | 0.01 | 0    | 0    | 0.02 | 0    | 0    | 0    |
| <i>Coleochaete orbicularis</i>                        | 0     | 0    | 0    | 0    | 0    | 0    | 0    | 0    | 0    | 0    | 0    | 0    | 0    | 0    | 0    | 0    | 0    | 0    | 0    | 0    | 0    | 0    |
| <i>Cosmarium botrytis</i>                             | 0     | 0    | 0    | 0    | 0    | 0    | 0    | 0    | 0    | 0    | 0    | 0    | 0    | 0    | 0    | 0    | 0    | 0    | 0    | 0    | 0    | 0    |
| <i>Cosmarium contractum</i>                           | 0     | 0    | 0    | 0.02 | 0    | 0.01 | 0    | 0    | 0    | 0    | 0    | 0    | 0    | 0    | 0    | 0    | 0    | 0.01 | 0    | 0    | 0    | 0    |
| <i>Cosmarium subprotumidum</i>                        | 0     | 0    | 0    | 0    | 0    | 0    | 0    | 0    | 0    | 0    | 0    | 0    | 0    | 0    | 0    | 0    | 0    | 0    | 0    | 0    | 0    | 0    |
| <i>Cylindrocystis brebissonii</i> var. <i>deserti</i> | 0     | 0    | 0.01 | 0    | 0    | 0    | 0    | 0    | 0    | 0    | 0    | 0    | 0    | 0    | 0    | 0    | 0    | 0    | 0    | 0    | 0    | 0    |
| <i>Cylindrocystis</i> sp. M3015                       | 0     | 0    | 0    | 0    | 0    | 0    | 0    | 0    | 0.02 | 0.02 | 0.01 | 0.01 | 0    | 0    | 0.1  | 0    | 0.03 | 0.01 | 0    | 0.02 | 0    | 0    |
| <i>Heterolobosea</i> sp. OSA                          | 0     | 0    | 0    | 0    | 0    | 0    | 0.02 | 0    | 0    | 0    | 0    | 0    | 0    | 0    | 0    | 0    | 0    | 0    | 0    | 0    | 0    | 0    |
| <i>Heterothrix debilis</i>                            | 0     | 0    | 0    | 0    | 0    | 0    | 0    | 0    | 0    | 0    | 0    | 0    | 0    | 0    | 0    | 0    | 0    | 0    | 0    | 0    | 0    | 0    |
| <i>Hormidiella attenuata</i>                          | 0     | 0    | 0.01 | 0    | 0    | 0    | 0    | 0    | 0    | 0    | 0    | 0    | 0    | 0    | 0    | 0    | 0    | 0    | 0    | 0    | 0    | 0    |
| <i>Hydrurus foetidus</i>                              | 80.46 | 0    | 0    | 0    | 0    | 0    | 0    | 0    | 0.27 | 0    | 0    | 0    | 0    | 0    | 0.48 | 0.02 | 0    | 0.03 | 0.01 | 0    | 0.1  | 0.01 |
| <i>Klebsormidium flaccidum</i>                        | 0     | 0    | 0    | 0    | 0    | 0    | 0    | 0    | 0    | 0    | 0    | 0    | 0    | 0    | 0    | 0    | 0    | 0    | 0    | 0    | 0    | 0    |
| <i>Mesotaenium berggrenii</i> var. <i>alaskana</i>    | 0     | 0.03 | 0.17 | 0.31 | 0.2  | 0.28 | 0.12 | 0.15 | 0    | 0.04 | 0.07 | 0.05 | 0.05 | 0.09 | 0.06 | 0.06 | 0.08 | 0.24 | 0.07 | 0    | 0    | 0.02 |
| <i>Mesotaenium</i> cf. <i>chlamydosporum</i> M-2155   | 0     | 0    | 0    | 0    | 0    | 0    | 0    | 0    | 0    | 0    | 0    | 0    | 0    | 0    | 0    | 0    | 0    | 0    | 0    | 0    | 0    | 0    |
| <i>Mesotaenium</i> sp. AG-2009-1                      | 0     | 0    | 0    | 0    | 0    | 0    | 0    | 0    | 0    | 0    | 0    | 0    | 0    | 0    | 0    | 0    | 0    | 0    | 0.03 | 0    | 0    | 0    |
| <i>Microglena polar</i> subclade                      | 0.32  | 0    | 0    | 0    | 0    | 0    | 0    | 0    | 0.01 | 0    | 0    | 0    | 0    | 0    | 0.07 | 0.01 | 0    | 0    | 0.01 | 0    | 0.04 | 0    |
| <i>Mychonastes homosphaera</i>                        | 0     | 0    | 0    | 0    | 0    | 0    | 0    | 0    | 0    | 0    | 0    | 0    | 0    | 0    | 0    | 0    | 0    | 0    | 0    | 0    | 0    | 0    |
| <i>Myrmecia bisecta</i>                               | 0     | 0    | 0    | 0    | 0    | 0    | 0    | 0    | 0    | 0    | 0    | 0    | 0    | 0    | 0    | 0    | 0    | 0.03 | 0    | 0    | 0    | 0    |
| <i>Neocystis brevis</i>                               | 0     | 0    | 0    | 0    | 0    | 0    | 0    | 0    | 0    | 0    | 0    | 0    | 0    | 0    | 0    | 0    | 0    | 0    | 0    | 0    | 0    | 0    |
| <i>Neovahlkampfia damariscottae</i>                   | 0     | 0    | 0    | 0    | 0.07 | 0    | 0.06 | 0    | 0    | 0    | 0    | 0    | 0    | 0    | 0.02 | 0.15 | 0    | 0    | 0    | 0    | 0    | 0    |
| <i>Nephroselmis rotunda</i>                           | 0     | 0    | 0    | 0    | 0.02 | 0    | 0.05 | 0    | 0    | 0.01 | 0    | 0.01 | 0    | 0    | 0.02 | 0.01 | 0    | 0    | 0.01 | 0    | 0    | 0    |
| No blast hit                                          | 0.34  | 0.01 | 0.05 | 0.09 | 0.29 | 0.03 | 0.33 | 0.02 | 0.03 | 0.1  | 0.11 | 0.11 | 0.12 | 0.01 | 0.16 | 0.41 | 0.02 | 0.1  | 0.11 | 0.02 | 0.29 | 0.04 |
| Ochromonadaceae environmental sample                  | 0     | 0    | 0    | 0    | 0    | 0    | 0    | 0    | 0    | 0    | 0    | 0    | 0    | 0    | 0    | 0    | 0    | 0    | 0    | 0    | 0    | 0    |
| <i>Ostreococcus tauri</i>                             | 0     | 0    | 0    | 0    | 0    | 0    | 0    | 0    | 0    | 0    | 0    | 0    | 0    | 0    | 0    | 0    | 0    | 0    | 0    | 0    | 0    | 0    |
| <i>Penium margaritaceum</i>                           | 0     | 0    | 0    | 0    | 0    | 0    | 0    | 0    | 0    | 0    | 0    | 0    | 0    | 0    | 0    | 0    | 0    | 0    | 0    | 0    | 0    | 0    |
| <i>Porphyridium</i> sp. MBIC10451                     | 0     | 0    | 0    | 0    | 0    | 0    | 0    | 0    | 0    | 0    | 0    | 0    | 0    | 0    | 0    | 0    | 0    | 0    | 0    | 0    | 0    | 0    |
| <i>Prasiola fluviatilis</i>                           | 0     | 0    | 0    | 0    | 0    | 0    | 0    | 0    | 0    | 0    | 0    | 0    | 0    | 0    | 0    | 0.01 | 0    | 0    | 0    | 0    | 0    | 0    |
| <i>Prototheca cutis</i>                               | 0     | 0    | 0    | 0    | 0    | 0    | 0    | 0    | 0    | 0    | 0    | 0    | 0    | 0    | 0    | 0    | 0    | 0    | 0.12 | 0    | 0    | 0    |
| <i>Pseudochlorella pringsheimii</i>                   | 0     | 0    | 0    | 0    | 0    | 0    | 0    | 0    | 0    | 0    | 0    | 0    | 0    | 0    | 0    | 0    | 0    | 0    | 0    | 0    | 0    | 0    |

|                                                       |      |      |      |      |      |      |       |       |      |      |      |      |      |      |      |       |      |      |      |      |       |      |   |
|-------------------------------------------------------|------|------|------|------|------|------|-------|-------|------|------|------|------|------|------|------|-------|------|------|------|------|-------|------|---|
| Pseudopediastrum kawraiskyi                           | 0    | 0    | 0    | 0    | 0    | 0    | 0     | 0     | 0    | 0    | 0    | 0    | 0    | 0    | 0    | 0     | 0    | 0    | 0    | 0    | 0     | 0    | 0 |
| Raphidonema sempervirens AJ309939                     | 0.28 | 0.01 | 0.17 | 0.13 | 11.6 | 0.17 | 21.34 | 0.05  | 0.01 | 4.08 | 3.29 | 2.93 | 3.48 | 0.34 | 8.48 | 23.88 | 1.1  | 1.72 | 3.84 | 5.64 | 20.41 | 0    |   |
| Saprolegnia sp. SAP1                                  | 0.01 | 0    | 0    | 0    | 0.49 | 0    | 0.02  | 0     | 0    | 0.02 | 0.01 | 0.01 | 0.03 | 0    | 0    | 0.28  | 0.02 | 0    | 0    | 0    | 0     | 0    |   |
| Sphaeroszma granulatum                                | 0    | 0    | 0    | 0    | 0    | 0    | 0     | 0     | 0    | 0    | 0    | 0    | 0    | 0    | 0    | 0     | 0    | 0    | 0    | 0    | 0     | 0    |   |
| Staurodesmus mucronatus                               | 0.01 | 0    | 0    | 0    | 0    | 0    | 0     | 0     | 0    | 0.36 | 0.01 | 0.01 | 0.25 | 0    | 0.01 | 0.7   | 0    | 0.04 | 0.01 | 0    | 0     | 0    |   |
| Stichococcus bacillaris                               | 0    | 0    | 0    | 0    | 0    | 0    | 0     | 0     | 0    | 0    | 0    | 0    | 0    | 0    | 0    | 0     | 0    | 0    | 0    | 0    | 0     | 0    |   |
| Stichococcus bacillaris                               | 0    | 0    | 0    | 0    | 0    | 0    | 0     | 0     | 0    | 0    | 0    | 0    | 0    | 0    | 0    | 0     | 0    | 0    | 0.99 | 0    | 0     | 0    |   |
| Stichococcus jenerensis                               | 0    | 0    | 0    | 0    | 0    | 0    | 0     | 0     | 0    | 0    | 0    | 0    | 0    | 0    | 0    | 0     | 0    | 0    | 0    | 0    | 0     | 0    |   |
| Stichococcus mirabilis                                | 0    | 0    | 0    | 0    | 0.01 | 0    | 0.02  | 0     | 0    | 0    | 0    | 0    | 0    | 0    | 0    | 0     | 0    | 0    | 0.02 | 0    | 0     | 0    |   |
| Trebouxia usneae                                      | 0    | 0    | 0    | 0    | 0    | 0    | 0     | 0     | 0    | 0.04 | 0    | 0    | 0    | 0    | 0    | 0     | 0    | 0    | 0    | 0    | 0     | 0    |   |
| uncultured Banisveld eukaryote                        | 0    | 0    | 0    | 0    | 0    | 0    | 0     | 0     | 0    | 0    | 0    | 0    | 0    | 0    | 0    | 0     | 0    | 0    | 0    | 0    | 0     | 0    |   |
| Uncultured Chlamydomonadaceae clone HW0117 Cr nivalis | 0.02 | 1.45 | 0.11 | 0.25 | 0.12 | 0.68 | 0.2   | 1.67  | 0.62 | 2.43 | 2.05 | 1.75 | 3.67 | 0.12 | 2.58 | 0.61  | 0.5  | 2.27 | 0.44 | 0.29 | 0.65  | 0.03 |   |
| Uncultured Chlamydomonadaceae GU117577                | 0.03 | 0    | 0.05 | 0.04 | 1.16 | 1.83 | 0.77  | 12.85 | 0    | 0.18 | 0.13 | 0.1  | 0.25 | 0    | 0.46 | 1.98  | 0.01 | 0.04 | 0.46 | 0.01 | 1.14  | 0.01 |   |
| uncultured Closteriaceae                              | 0    | 0    | 0.07 | 0    | 0.01 | 0.02 | 0     | 0.01  | 0    | 0.01 | 0.01 | 0.01 | 0    | 0    | 0.01 | 0.01  | 0.02 | 0.08 | 0.02 | 0    | 0     | 0    |   |
| uncultured Closteriaceae                              | 0    | 0    | 0    | 0    | 0    | 0    | 0     | 0     | 0    | 0    | 0    | 0    | 0    | 0    | 0    | 0     | 0    | 0    | 0    | 0    | 0     | 0    |   |
| uncultured dinoflagellate                             | 0    | 0    | 0    | 0    | 0    | 0    | 0     | 0     | 0    | 0    | 0    | 0    | 0    | 0    | 0    | 0     | 0    | 0    | 0    | 0    | 0     | 0    |   |
| uncultured Eimeriidae                                 | 0.13 | 0    | 0    | 0    | 0.61 | 0    | 0     | 0     | 0.01 | 0.22 | 0.52 | 0.45 | 0.18 | 0    | 0    | 4     | 0    | 0    | 0    | 0.02 | 0     | 0    |   |
| Uncultured marine stramenopile                        | 0.02 | 0    | 0.01 | 0.01 | 0.21 | 0.01 | 0.01  | 0.01  | 0    | 0.09 | 0.15 | 0.13 | 0.35 | 0.01 | 0.02 | 1.26  | 0.01 | 0.07 | 0.03 | 0.01 | 0     | 0.72 |   |
| uncultured Prasinophyceae                             | 0    | 0    | 0    | 0    | 0.18 | 0    | 0.4   | 0     | 0    | 0    | 0    | 0    | 0    | 0    | 0    | 0     | 0    | 0    | 0    | 0    | 0.01  | 0    |   |
| Uncultured stramenopile                               | 0    | 0    | 0    | 0    | 0    | 0    | 0     | 0     | 0    | 0    | 0    | 0    | 0    | 0    | 0    | 0     | 0    | 0    | 0    | 0    | 0     | 0    |   |
| uncultured Zygnematales                               | 0    | 0    | 0    | 0    | 0    | 0    | 0     | 0     | 0    | 0    | 0    | 0    | 0    | 0    | 0    | 0     | 0    | 0    | 0    | 0    | 0     | 0    |   |
| Vahlkampfia avara                                     | 0    | 0    | 0    | 0    | 0    | 0    | 0     | 0     | 0    | 0    | 0    | 0    | 0    | 0    | 0    | 0.01  | 0    | 0    | 0    | 0    | 0     | 0    |   |
| Xanthophyceae sp. IX3                                 | 0    | 0    | 0    | 0    | 0    | 0    | 0     | 0     | 0    | 0    | 0    | 0    | 0    | 0    | 0    | 0     | 0    | 0    | 0.12 | 0    | 0     | 0    |   |
| Zygnema circumcarinatum                               | 0    | 0    | 0.02 | 0.01 | 0.1  | 0.06 | 0.07  | 0.07  | 0    | 0.01 | 0.01 | 0.01 | 0.02 | 0    | 0.02 | 0     | 0.01 | 0.02 | 0.02 | 0    | 0     | 0.01 |   |
| Zygnema cylindricum                                   | 0    | 0    | 0    | 0    | 0    | 0    | 0     | 0     | 0    | 0    | 0    | 0    | 0    | 0    | 0    | 0     | 0    | 0    | 0    | 0    | 0     | 0    |   |

**Supplementary Table 5:** Oligotype distribution of *Ancyλονema nordenskiöldii* in % of overall relative abundance. Oligotype names are derived from the nucleotide variations in the sequence alignment.

| <b>Sample</b>     | <b>Site</b> | <b>C</b> | <b>A</b> |
|-------------------|-------------|----------|----------|
| <b>GrIS16_1</b>   | 1a          | 18.2     | 81.8     |
| <b>GrIS16_22</b>  | 1b          | 1.2      | 98.8     |
| <b>GrIS16_2</b>   | 2           | 67.5     | 32.5     |
| <b>GrIS16_9</b>   | 2           | 89.2     | 10.8     |
| <b>GrIS16_3</b>   | 3           | 89.8     | 10.2     |
| <b>GrIS16_4</b>   | 3           | 85.4     | 14.6     |
| <b>GrIS16_10</b>  | 3           | 82.0     | 18.0     |
| <b>GrIS16_11</b>  | 3           | 83.7     | 16.3     |
| <b>GrIS16_air</b> | base camp   | 1.9      | 98.1     |
| <b>GrIS16_5</b>   | base camp   | 34.0     | 66.0     |
| <b>GrIS16_6</b>   | base camp   | 25.2     | 74.8     |
| <b>GrIS16_7</b>   | base camp   | 25.1     | 74.9     |
| <b>GrIS16_8</b>   | base camp   | 17.7     | 82.3     |
| <b>GrIS16_12</b>  | base camp   | 47.5     | 52.5     |
| <b>GrIS16_13</b>  | base camp   | 63.2     | 36.8     |
| <b>GrIS16_14</b>  | base camp   | 46.2     | 53.8     |
| <b>GrIS16_16</b>  | base camp   | 6.9      | 93.1     |
| <b>GrIS16_17</b>  | base camp   | 59.0     | 41.0     |
| <b>GrIS16_18</b>  | base camp   | 28.0     | 72.0     |
| <b>GrIS16_19</b>  | base camp   | 20.9     | 79.1     |
| <b>GrIS16_27</b>  | base camp   | 5.8      | 94.2     |



**Supplementary Table 6:** Oligotype distribution of *Raphidonema sempervirens* in % of overall relative abundance. Oligotype names are derived from the nucleotide variations in the sequence alignment.

| Sample     | Site      | TTCTACTT | TTTTACCT | TTTTACTT | TTTCCCTC | TTCCAATT | GCACGCCT |
|------------|-----------|----------|----------|----------|----------|----------|----------|
| GrIS16_1   | 1a        | 6.4      | 6.4      | 87.2     | 0        | 0        | 0        |
| GrIS16_22  | 1b        | 60.0     | 30.0     | 10.0     | 0        | 0        | 0        |
| GrIS16_2   | 2         | 3.4      | 0.8      | 95.3     | 0        | 0.4      | 0        |
| GrIS16_9   | 2         | 3.7      | 0.9      | 95.4     | 0        | 0        | 0        |
| GrIS16_3   | 3         | 94.1     | 3.5      | 1.6      | 0        | 0.8      | 0        |
| GrIS16_4   | 3         | 29.5     | 15.1     | 55.0     | 0        | 0.4      | 0        |
| GrIS16_10  | 3         | 66.4     | 20.6     | 12.3     | 0        | 0.6      | 0        |
| GrIS16_11  | 3         | 28.0     | 10.7     | 61.3     | 0        | 0        | 0        |
| GrIS16_air | base camp | 12.5     | 12.5     | 75.0     | 0        | 0        | 0        |
| GrIS16_5   | base camp | 64.9     | 16.8     | 10.4     | 7.3      | 0.6      | 0        |
| GrIS16_6   | base camp | 44.7     | 27.2     | 14.6     | 13.2     | 0.3      | 0        |
| GrIS16_7   | base camp | 44.8     | 27.8     | 13.7     | 13.3     | 0.4      | 0        |
| GrIS16_8   | base camp | 70.1     | 14.1     | 7.9      | 7.3      | 0.6      | 0        |
| GrIS16_12  | base camp | 88.3     | 4.8      | 5.6      | 0.2      | 1.1      | 0        |
| GrIS16_13  | base camp | 59.6     | 22.1     | 15.1     | 2.6      | 0.6      | 0        |
| GrIS16_14  | base camp | 57.7     | 24.3     | 12.2     | 5.2      | 0.7      | 0        |
| GrIS16_16  | base camp | 67.4     | 21.0     | 8.2      | 2.8      | 0.6      | 0        |
| GrIS16_17  | base camp | 52.5     | 24.9     | 18.0     | 4.3      | 0.3      | 0        |
| GrIS16_18  | base camp | 55.9     | 26.8     | 12.2     | 3.1      | 0.3      | 1.8      |
| GrIS16_19  | base camp | 52.5     | 28.7     | 18.1     | 0.2      | 0.5      | 0        |
| GrIS16_27  | base camp | 14.3     | 0        | 85.7     | 0        | 0        | 0        |

**Supplementary Table 7:** Oligotype distribution of the uncultured *Chlamydomonadaceae* HW0117 in % of overall relative abundance. Oligotype names are derived from the nucleotide variations in the sequence alignment.

| Sample     | Site      | GGTATGC | GGTATTT | GGTATAT | GGTATGT | GTAGTAG | TAAGCAT | GGTGCAAT | GAAGCAT |
|------------|-----------|---------|---------|---------|---------|---------|---------|----------|---------|
| GrIS16_1   | 1a        | 100     | 0       | 0       | 0       | 0       | 0       | 0        | 0       |
| GrIS16_22  | 1b        | 84.9    | 3.3     | 3.1     | 2.0     | 2.4     | 1.8     | 2.0      | 0.5     |
| GrIS16_2   | 2         | 89.0    | 2.8     | 0.7     | 0.7     | 1.4     | 2.8     | 1.4      | 1.4     |
| GrIS16_9   | 2         | 84.2    | 2.2     | 3.3     | 1.8     | 4.0     | 1.6     | 0.9      | 2.0     |
| GrIS16_3   | 3         | 90.2    | 0.9     | 2.7     | 0.9     | 2.2     | 1.8     | 1.3      | 0.0     |
| GrIS16_4   | 3         | 85.5    | 3.6     | 2.0     | 2.2     | 3.0     | 1.5     | 1.5      | 0.5     |
| GrIS16_10  | 3         | 90.1    | 1.8     | 0       | 2.9     | 3.6     | 0.7     | 0.7      | 0       |
| GrIS16_11  | 3         | 86.3    | 3.3     | 1.9     | 2.2     | 2.2     | 2.1     | 1.4      | 0.6     |
| GrIS16_air | base camp | 98.2    | 0       | 0.2     | 0       | 1.5     | 0.2     | 0.0      | 0       |
| GrIS16_5   | base camp | 89.3    | 2.0     | 1.8     | 1.9     | 2.1     | 1.5     | 1.0      | 0.4     |
| GrIS16_6   | base camp | 87.6    | 2.5     | 2.2     | 1.7     | 2.3     | 1.5     | 1.3      | 1.0     |
| GrIS16_7   | base camp | 88.9    | 2.1     | 1.7     | 2.0     | 2.3     | 1.3     | 1.1      | 0.6     |
| GrIS16_8   | base camp | 89.0    | 2.3     | 1.6     | 1.4     | 2.5     | 1.5     | 1.3      | 0.5     |
| GrIS16_12  | base camp | 88.4    | 2.2     | 0.4     | 1.3     | 2.7     | 3.1     | 0.9      | 0.9     |
| GrIS16_13  | base camp | 90.0    | 1.7     | 1.7     | 1.5     | 2.2     | 1.2     | 1.1      | 0.6     |
| GrIS16_14  | base camp | 96.4    | 0.3     | 0.2     | 0.6     | 1.7     | 0.6     | 0        | 0.2     |
| GrIS16_16  | base camp | 84.7    | 3.3     | 2.1     | 2.3     | 2.6     | 2.9     | 1.8      | 0.3     |
| GrIS16_17  | base camp | 86.3    | 3.2     | 2.0     | 2.2     | 2.8     | 1.5     | 1.3      | 0.9     |
| GrIS16_18  | base camp | 91.4    | 2.1     | 0.2     | 1.1     | 2.6     | 1.1     | 1.1      | 0.4     |
| GrIS16_19  | base camp | 97.1    | 0.2     | 0.4     | 0       | 1.4     | 0       | 0.2      | 0.6     |
| GrIS16_27  | base camp | 81.1    | 11.3    | 3.8     | 1.9     | 0       | 1.9     | 0        | 0       |

**Supplementary Table 8:** Oligotype distribution of the uncultured *Chlamydomonadaceae* DR1WP27 in % of overall relative abundance. Oligotype names are derived from the nucleotide variations in the sequence alignment.

| Sample     | Site      | CTTCTGC | CTTCCAT | TTACCGC | TAATCGC | CTTCTTT | CTACTGC | CTTCTGT | TTTCTGC | CTTCCTT | CTTATGC | CTTCCGC | TTACCAT | TTACCGT | TTACCTT |
|------------|-----------|---------|---------|---------|---------|---------|---------|---------|---------|---------|---------|---------|---------|---------|---------|
| GriS16_1   | 1a        | 100     | 0       | 0       | 0       | 0       | 0       | 0       | 0       | 0.0     | 0       | 0       | 0       | 0       | 0       |
| GriS16_22  | 1b        | 100     | 0.0     | 0       | 0       | 0       | 0       | 0       | 0       | 0       | 0       | 0       | 0       | 0       | 0       |
| GriS16_2   | 2         | 15.9    | 1.4     | 78.3    | 0       | 0       | 0       | 0       | 0       | 0       | 0       | 0       | 0       | 4.3     | 0       |
| GriS16_9   | 2         | 83.1    | 7.0     | 0       | 0       | 2.8     | 0       | 0       | 5.6     | 1.4     | 0       | 0       | 0       | 0       | 0       |
| GriS16_3   | 3         | 45.4    | 2.2     | 19.0    | 29.3    | 0.6     | 0       | 0.5     | 0.7     | 0.5     | 0       | 0.3     | 0.6     | 0.6     | 0.3     |
| GriS16_4   | 3         | 86.1    | 7.1     | 0       | 0       | 1.7     | 0       | 2.1     | 1.7     | 1.3     | 0       | 0       | 0       | 0       | 0       |
| GriS16_10  | 3         | 67.0    | 2.9     | 6.9     | 18.5    | 0.8     | 0.1     | 1.3     | 0.8     | 0.6     | 0       | 1.0     | 0.1     | 0       | 0       |
| GriS16_11  | 3         | 86.2    | 7.2     | 0       | 0       | 2.4     | 0       | 1.6     | 1.6     | 0.9     | 0       | 0.1     | 0       | 0       | 0       |
| GriS16_air | base camp | 100     | 0       | 0       | 0       | 0       | 0       | 0       | 0       | 0       | 0       | 0       | 0       | 0       | 0       |
| GriS16_5   | base camp | 46.7    | 2.9     | 43.8    | 1.0     | 1.0     | 1.0     | 1.4     | 0.5     | 0       | 0       | 0       | 1.4     | 0       | 0.5     |
| GriS16_6   | base camp | 40.1    | 2.9     | 45.4    | 3.9     | 1.0     | 1.9     | 1.0     | 0.5     | 0       | 0       | 0.5     | 1.9     | 0       | 1.0     |
| GriS16_7   | base camp | 38.3    | 2.3     | 49.1    | 2.9     | 0       | 0.6     | 2.3     | 0       | 0.6     | 0       | 0       | 1.7     | 0       | 2.3     |
| GriS16_8   | base camp | 79.8    | 4.0     | 9.7     | 0       | 1.6     | 1.6     | 1.2     | 1.6     | 0.6     | 0       | 0       | 0       | 0       | 0       |
| GriS16_12  | base camp | 100     | 0       | 0       | 0       | 0       | 0       | 0       | 0       | 0       | 0       | 0       | 0       | 0       | 0       |
| GriS16_13  | base camp | 74.0    | 4.1     | 4.5     | 1.3     | 2.0     | 8.7     | 1.0     | 1.0     | 0.6     | 2.3     | 0.2     | 0.1     | 0.2     | 0.2     |
| GriS16_14  | base camp | 46.0    | 1.5     | 29.3    | 5.3     | 0.3     | 12.1    | 0.3     | 0.1     | 0       | 3.5     | 0.7     | 0.5     | 0.2     | 0.1     |
| GriS16_16  | base camp | 61.1    | 16.7    | 0       | 11.1    | 5.6     | 5.6     | 0       | 0       | 0       | 0       | 0       | 0       | 0       | 0       |
| GriS16_17  | base camp | 47.4    | 1.8     | 7.0     | 0       | 3.5     | 35.1    | 3.5     | 0       | 0       | 1.8     | 0       | 0       | 0       | 0       |
| GriS16_18  | base camp | 91.5    | 3.9     | 0.4     | 0       | 0.6     | 0.8     | 0.4     | 0.4     | 0       | 0       | 1.9     | 0       | 0       | 0       |
| GriS16_19  | base camp | 55.6    | 0       | 44.4    | 0       | 0       | 0       | 0       | 0       | 0       | 0       | 0       | 0       | 0       | 0       |
| GriS16_27  | base camp | 100     | 0       | 0       | 0       | 0       | 0       | 0       | 0       | 0       | 0       | 0       | 0       | 0       | 0       |

**Supplementary Table 9:** Total abundance of each oligotype, their fasta sequences and the closest BLAST matches. Oligotype names are derived from the nucleotide variations in the sequence alignment.

| Oligotyping                 |           |                 |                                                                                                                                                                                                                                                                                                                                                                  | Best BLAST hit   |                                                                                                        |             |         |          |
|-----------------------------|-----------|-----------------|------------------------------------------------------------------------------------------------------------------------------------------------------------------------------------------------------------------------------------------------------------------------------------------------------------------------------------------------------------------|------------------|--------------------------------------------------------------------------------------------------------|-------------|---------|----------|
| Taxon                       | Oligotype | Total abundance | Fasta sequence                                                                                                                                                                                                                                                                                                                                                   | Accession number | Description                                                                                            | Query cover | e-value | Identity |
| Ancydonema                  | A         | 1,744,812       | CCAGCTCCAATAGCGTATATTTAAGTTGTTGCAGTTA<br>AAAAGCTCGTAGTTGGATTTGGGTTGGTGTGGTCCG<br>GTCTGCTTTCTAGTTGAACTGGCTACTCCATCCTTCT<br>TGCCGGGGACGCGTTCTGGCCTTAATTGGCTGGGA<br>CGCGGAGTCGGCGATGTTACTTTGAAAAAATTAGAG<br>TGTTCAAAGCAGGCCTACGCTCTGAATACATTAGCA<br>TGAATAACGTGATAGGACTCTGGTCCTATTGTGTT<br>GGTCTTCGGGACCGGAGTAATGATTAATAGGGACA<br>GTTGGGGGCATTTCGATTTTCATTGTCAGAGGT | AF514397.2       | Ancydonema nordenskiöldii strain<br>CCCrho BS_0001-2000 18S<br>ribosomal RNA gene, partial<br>sequence | 100%        | 3e-165  | 100%     |
|                             | C         | 1,397,049       | CCAGCTCCAATAGCGTATATTTAAGTTGTTGCAGTTA<br>AAAAGCTCGTAGTTGGATTTGGGTTGGTGTGGTCCG<br>GTCTGCTTTCTAGTTGAACTGGCTACTCCATCCTTCT<br>TGCCGGGGACGCGTTCTGGCCTTCATTGGCTGGGA<br>CGCGGAGTCGGCGATGTTACTTTGAAAAAATTAGAG<br>TGTTCAAAGCAGGCCTACGCTCTGAATACATTAGCA<br>TGAATAACGTGATAGGACTCTGGTCCTATTGTGTT<br>GGTCTTCGGGACCGGAGTAATGATTAATAGGGACA<br>GTTGGGGGCATTTCGATTTTCATTGTCAGAGGT | AF514397.2       | Ancydonema nordenskiöldii strain<br>CCCrho BS_0001-2000 18S<br>ribosomal RNA gene, partial<br>sequence | 100%        | 1e-163  | 99%      |
| Raphidonema<br>sempervirens | TTCTACTT  | 96,107          | CCAGCTCCAATAGCGTATATTTAAGTTGCTGCAGTTA<br>AAAAGCTCGTAGTTGGATTTCCGGATGGGTTCCGTCG<br>GTCCGCCGTCTCGGTGTGCACTGACGGCGCCATC<br>TTGCTGTCCGGGACGGGCTCCTGGGCTTCACTGTC<br>CGGGACTCGGAGTCGACGAGGTTACTTTGAGTAAAT<br>TAGAGTGTTCAAAGCAGGCCTACGCTCTGAATACAT<br>TAGCATGGAATAACACGATAGGACTCTGGCCTATCT<br>TGTTGGTCTGTAGGACCGGAGTAATGATTAAGAGGG<br>ACAGTCGGGGCATTTCGATTTTCATTGTCAGAG | KM870650.1       | Uncultured eukaryote clone<br>TE107A 18S ribosomal RNA gene,<br>complete sequence                      | 100%        | 3e-165  | 100%     |
|                             |           |                 |                                                                                                                                                                                                                                                                                                                                                                  | AF514410.2       | Raphidonema sempervirens strain<br>CCCrho 011a-99 18S ribosomal<br>RNA gene, partial sequence          | 100%        | 1e-163  | 99%      |
|                             | TTTTACCT  | 30,283          | CCAGCTCCAATAGCGTATATTTAAGTTGCTGCAGTTA<br>AAAAGCTCGTAGTTGGATTTCCGGATGGGTTCCGTCG<br>GTCCGCCGTTTCGGTGTGCACTGACGGCGCCATC<br>TTGCTGTCCGGGACGGGCTCCTGGGCTTCACTGTC<br>CGGGACTCGGAGTCGACGAGGTTACTTTGAGTAAAT<br>TAGAGTGTTCAAAGCAGGCCTACGCTCTGAATACAT<br>TAGCATGGAATAACACGATAGGACTCTGGCCTATCT<br>TGTTGGTCTGTAGGACCGGAGTAATGATTAAGAGGG<br>ACAGTCGGGGCATTTCGATTTTCATTGTCAGAG | KM870706.1       | Uncultured eukaryote clone<br>TE203C 18S ribosomal RNA<br>gene, complete sequence                      | 100%        | 3e-165  | 100%     |
|                             |           |                 |                                                                                                                                                                                                                                                                                                                                                                  | AF514410.2       | Raphidonema sempervirens strain<br>CCCrho 011a-99 18S ribosomal<br>RNA gene, partial sequence          | 100%        | 1e-163  | 99%      |

|          |        |                                                                                                                                                                                                                                                                                                                                                                   |            |                                                                                               |      |        |      |
|----------|--------|-------------------------------------------------------------------------------------------------------------------------------------------------------------------------------------------------------------------------------------------------------------------------------------------------------------------------------------------------------------------|------------|-----------------------------------------------------------------------------------------------|------|--------|------|
| TTTTACTT | 18,169 | CCAGCTCCAATAGCGTATATTTAAGTTGCTGCAGTTA<br>AAAAGCTCGTAGTTGGATTTCCGGATGGGTTCCGTCG<br>GTCCGCCGTTCCGGTGTGCACTGACGGCGCCTATC<br>TTGCTGTCGGGGACGGGCTCCTGGGCTTCACTGTC<br>CGGGACTCGGAGTCGACGAGGTTACTTTGAGTAAAT<br>TAGAGTGTTCAAAGCAGGCCTACGCTCTGAATACAT<br>TAGCATGGAATAACACGATAGGACTCTGGCCTATCT<br>TGTTGGTCTGTAGGACCGAGTAATGATTAAGAGGG<br>ACAGTCGGGGGCATTTCGATTTTCATTGTCAGAG | AF514410.2 | Raphidonema sempervirens strain<br>CC2ryo 011a-99 18S ribosomal<br>RNA gene, partial sequence | 100% | 3e-165 | 100% |
|          |        |                                                                                                                                                                                                                                                                                                                                                                   | KM870742.1 | Uncultured eukaryote clone<br>TE208D 18S ribosomal RNA<br>gene, complete sequence             | 100% | 3e-165 | 100% |
| TTCCCTC  | 4,994  | CCAGCTCCAATAGCGTATATTTAAGTTGCTGCAGTTA<br>AAAAGCTCGTAGTTGGATTTCCGGATGGGTTCCGTCG<br>GTCCGCCGTTCCGGTGTGCACTGCCGGCGCCTATC<br>TTGCTGTCGGGGACGGGCTCCTGGGCTTCACTGTC<br>CGGGACCCGGAGTCGACGAGGTTACTTTGAGTAAA<br>TTAGAGTGTTCAAAGCAGGCCTACGCTCTGAATACA<br>TTAGCATGGAATAACACGATAGGACTCTGGCCTATC<br>TTGTTGGTCTGTAGGACCGAGTAATGATTAAGAGG<br>GACAGTCGGGGGCATTTCGATTTTCATTGTCAGAG | KM870651.1 | Uncultured eukaryote clone<br>TE107B 18S ribosomal RNA gene,<br>complete sequence             | 100% | 1e-163 | 99%  |
|          |        |                                                                                                                                                                                                                                                                                                                                                                   | KM870611.1 | Raphidonema sempervirens strain<br>CC2ryo 011a-99 18S ribosomal<br>RNA gene, partial sequence | 100% | 1e-163 | 99%  |
| TTCCACTT | 941    | CCAGCTCCAATAGCGTATATTTAAGTTGCTGCAGTTA<br>AAAAGCTCGTAGTTGGATTTCCGGATGGGTTCCGTCG<br>GTCCGCCGTTCCGGTGTGCACTGACGGCGCCTATC<br>TTGCTGTCGGGGACGGGCTCCTGGGCTTCACTGTC<br>CGGGACTCGGAGTCGACGAGGTTACTTTGAGTAAAT<br>TAGAGTGTTCAAAGCAGGCCTACGCTCTGAATACAT<br>TAGCATGGAATAACACGATAGGACTCTGGCCTATCT<br>TGTTGGTCTGTAGGACCGAGTAATGATTAAGAGGG<br>ACAGTCGGGGGCATTTCGATTTTCATTGTCAGAG | KM870650.1 | Uncultured eukaryote clone<br>TE107A 18S ribosomal RNA gene,<br>complete sequence             | 100% | 1e-163 | 99%  |
|          |        |                                                                                                                                                                                                                                                                                                                                                                   | AF514410.2 | Raphidonema sempervirens strain<br>CC2ryo 011a-99 18S ribosomal<br>RNA gene, partial sequence | 100% | 5e-162 | 99%  |
| GCACGCCT | 70     | CCAGCTCCAATAGCGTATATTTAAGTTGCTGCAGTTA<br>AAAAGCTCGTAGTTGGATTTCCGGATGGGTTCCGTCG<br>GTCCGCCTCACGGTGTGTTACTGGCGGCGCCCATC<br>TTGCTGTCGGGGACGGGCTCCTGGGCTTAACTGTC<br>TGGGACTCGGAGTCGACGAGGTTACTTTGAGTAAAT<br>TAGAGTGTTCAAAGCAGGCCTACGCTCTGAATACAT<br>TAGCATGGAATAACACTATAGGACTCTGGCCTATCT<br>TGTTGGTCTGTAGGACCGAGTAATGATTAAGAGGG<br>ACAGTCGGGGGCATTTCGATTTTCATTGTCAGAG | FJ490230.1 | Uncultured Trebouxiophyceae<br>clone H_27 18S ribosomal RNA<br>gene, partial sequence         | 100% | 3e-160 | 99%  |

|                                             |         |        |                                                                                                                                                                                                                                                                                                                                                                   |            |                                                                                                    |      |        |     |
|---------------------------------------------|---------|--------|-------------------------------------------------------------------------------------------------------------------------------------------------------------------------------------------------------------------------------------------------------------------------------------------------------------------------------------------------------------------|------------|----------------------------------------------------------------------------------------------------|------|--------|-----|
| <b>Uncultured Chlamydomonadaceae HW0117</b> | GGTATGC | 30,640 | CCAGCTCCAATAGCGTATATTTAAGTTGTTGCAGTTA<br>AAAAGCTCGTAGTTGGATTTCCGGATGGGTATCAATG<br>GTCCGGTTCGCTGTGTAAGTTGCTGCCTATCTTTC<br>TGCCGGAAATGGGATCTTAGGCTTTACTGTCTGAGA<br>CCTAGAGTCGGCGAGGTTACTTTGAGTAAATTAGAG<br>TGTTCAAAGCAAGCTTACGCTCTGAATACATTAGCAT<br>GGAATAACACAATAGGACTTCGGCCTATCTTGTTGG<br>TCTGTAGGACTGAAGTAATGATTAAGAGGGACAGTC<br>GGGGCATTTCGTATTTTCATTGTCAGAGGTG | GU117575.1 | Uncultured Chlamydomonadaceae clone HW01/17 18S small subunit ribosomal RNA gene, partial sequence | 100% | 3e-160 | 99% |
|                                             | GTAGTAG | 810    | CAGCTCCAATAGCGTATATTTAAGTTGTTGCAGTTAA<br>AAAGCTCGTAGTTGGATTTCCGGATGGGTATCAATGG<br>TCCGGTTCGCTGTGTAAGTTGCTGCCTATCTTTC<br>GCCGGAAATGGGATCTTAGGCTTTACTGTCTGAGAC<br>CTAGAGTCGGCGAGGTTACTTTGAGTAAATTAGAGT<br>GTTCAAAGCAAGCTTACGCTCTGAATACATTAGCAT<br>GGAATAACACAATAGGACTTCGGCCTATCTTGTTGG<br>TCTGTAGGACTGAAGTAATGATTAAGAGGGACAGTC<br>GGGGCATTTCGTATTTTCATTGTCAGAGGTGA  | GU117575.1 | Uncultured Chlamydomonadaceae clone HW01/17 18S small subunit ribosomal RNA gene, partial sequence | 100% | 3e-160 | 99% |
|                                             | GGTATTT | 804    | CCAGCTCCAATAGCGTATATTTAAGTTGTTGCAGTTA<br>AAAAGCTCGTAGTTGGATTTCCGGATGGGTATCAATG<br>GTCCGGTTCGCTGTGTAAGTTGCTGCCTATCTTTC<br>TGCCGGAAATGGGATCTTAGGCTTTACTGTCTGAGA<br>CCTAGAGTCGGCGAGGTTACTTTGAGTAAATTAGAG<br>TGTTCAAAGCAAGCTTACGCTCTGAATACATTAGCAT<br>GGAATAACACAATAGGACTTCGGCCTATCTTGTTGG<br>TCTGTAGGACTGAAGTAATGATTAATAGGGACAGTT<br>GGGGCATTTCGTATTTTCATTGTCAGAGGTG | GU117575.1 | Uncultured Chlamydomonadaceae clone HW01/17 18S small subunit ribosomal RNA gene, partial sequence | 100% | 5e-157 | 98% |
|                                             | GGTATAT | 611    | CCAGCTCCAATAGCGTATATTTAAGTTGTTGCAGTTA<br>AAAAGCTCGTAGTTGGATTTCCGGATGGGTATCAATG<br>GTCCGGTTCGCTGTGTAAGTTGCTGCCTATCTTTC<br>TGCCGGAAATGGGATCTTAGGCTTTACTGTCTGAGA<br>CCTAGAGTCGGCGAGGTTACTTTGAGTAAATTAGAG<br>TGTTCAAAGCAAGCTTACGCTCTGAATACATTAGCAT<br>GGAATAACGTGATAGGACTCTGGTCCTATTGTGTTG<br>GTCTTCGGGACCGGAGTAATGATTAATAGGGACAGT<br>TGGGGCATTTCGTATTTTCATTGTCAGAGGT | GU117575.1 | Uncultured Chlamydomonadaceae clone HW01/17 18S small subunit ribosomal RNA gene, partial sequence | 100% | 9e-135 | 94% |

|         |     |                                                                                                                                                                                                                                                                                                                                                                 |            |                                                                                                             |      |        |     |
|---------|-----|-----------------------------------------------------------------------------------------------------------------------------------------------------------------------------------------------------------------------------------------------------------------------------------------------------------------------------------------------------------------|------------|-------------------------------------------------------------------------------------------------------------|------|--------|-----|
| GGTATGT | 584 | CCAGCTCCAATAGCGTATATTTAAGTTGTTGCAGTTA<br>AAAAGCTCGTAGTTGGATTTTCGGATGGGTATCAATG<br>GTCCGGTTCGCTGTGTAAGTTGCTGCCTATCTTTC<br>TGCCGGAAATGGGATCTTAGGCTTTACTGTCTGAGA<br>CCTAGAGTCGGCGAGGTTACTTTGAGTAAATTAGAG<br>TGTTCAAAGCAAGCTTACGCTCTGAATACATTAGCAT<br>GGAATAACACAATAGGACTTCGGCCTATCTTGTGG<br>TCTGTAGGACTGAAGTAATGATTAAGAGGGACAGTT<br>GGGGCATTTCGATTTTCATTGTCAGAGGTG | GU117575.1 | Uncultured Chlamydomonadaceae<br>clone HW01/17 18S small subunit<br>ribosomal RNA gene, partial<br>sequence | 100% | 1e-158 | 99% |
| TAAGCAT | 506 | CCAGCTCCAATAGCGTATATTTAAGTTGTTGCAGTTA<br>AAAAGCTCGTAGTTGGATTTTCGGATGGGTATCAATG<br>GTCCGGTTCGCTGTGTAAGTTGCTGCCTATCTTTC<br>TGCCGGAAATGGGATCTTAGGCTTTACTGTCTGAGA<br>CCTAGAGTCGGCGATGTTACTTTGAAAAAATTAGAG<br>TGTTCAAAGCAGGCTACGCTCTGAATACATTAGCA<br>TGGAATAACGTGATAGGACTCTGGTCTATTGTGTT<br>GGTCTTCGGGACCGGAGTAATGATTAATAGGGACA<br>GTTGGGGGCATTTCGATTTTCATTGTCAGAGGT | GU117575.1 | Uncultured Chlamydomonadaceae<br>clone HW01/17 18S small subunit<br>ribosomal RNA gene, partial<br>sequence | 100% | 2e-126 | 93% |
| GGTGAT  | 416 | CCAGCTCCAATAGCGTATATTTAAGTTGTTGCAGTTA<br>AAAAGCTCGTAGTTGGATTTTCGGATGGGTATCAATG<br>GTCCGGTTCGCTGTGTAAGTTGCTGCCTATCTTTC<br>TGCCGGAAATGGGATCTTAGGCTTTACTGTCTGAGA<br>CCTAGAGTCGGCGAGGTTACTTTGAGTAAATTAGAG<br>TGTTCAAAGCAGGCTACGCTCTGAATACATTAGCA<br>TGGAATAACGTGATAGGACTCTGGTCTATTGTGTT<br>GGTCTTCGGGACCGGAGTAATGATTAATAGGGACA<br>GTTGGGGGCATTTCGATTTTCATTGTCAGAGGT | GU117575.1 | Uncultured Chlamydomonadaceae<br>clone HW01/17 18S small subunit<br>ribosomal RNA gene, partial<br>sequence | 100% | 2e-131 | 94% |
| GAAGCAT | 206 | CCAGCTCCAATAGCGTATATTTAAGTTGTTGCAGTTA<br>AAAAGCTCGTAGTTGGATTTTCGGATGGGTATCAATG<br>GTCCGGTTCGCTGTGTAAGTTGCTGCCTATCTTTC<br>TGCCGGAAATGGGATCTTAGGCTTTACTGTCTGAGA<br>CCTAGAGTCGGCGAGGTTACTTTGAAAAAATTAGAG<br>TGTTCAAAGCAGGCTACGCTCTGAATACATTAGCA<br>TGGAATAACGTGATAGGACTCTGGTCTATTGTGTT<br>GGTCTTCGGGACCGGAGTAATGATTAATAGGGACA<br>GTTGGGGGCATTTCGATTTTCATTGTCAGAGGT | GU117575.1 | Uncultured Chlamydomonadaceae<br>clone HW01/17 18S small subunit<br>ribosomal RNA gene, partial<br>sequence | 100% | 4e-128 | 93% |

|                                                           |          |        |                                                                                                                                                                                                                                                                                                                                                                      |            |                                                                                                                  |      |        |      |
|-----------------------------------------------------------|----------|--------|----------------------------------------------------------------------------------------------------------------------------------------------------------------------------------------------------------------------------------------------------------------------------------------------------------------------------------------------------------------------|------------|------------------------------------------------------------------------------------------------------------------|------|--------|------|
| <b>Uncultured<br/>Chlamydomo<br/>nadaceae<br/>DR1WP27</b> | CTTCTGC  | 24,952 | CCAGCTCCAATAGCGTATATTTAAGTTGTTGCAGTTA<br>AAAAGCTCGTAGTTGGATTTTCGGGTGGGTTTCGGTCCG<br>GTCCGCCTCTGGTGTGCACTGATTGAGCCTTCCTTT<br>CTGCCGGGGACGGGTTCTGGGCCCTCACGGTTTGG<br>GACTCGGAGTCGGCGAGGTTACTTTGAGTAAATTAG<br>AGTGTTCAAAGCAAGCCTACGCTCTGAATACATTAG<br>CATGGAATAACGCGATAGGACTCTGGCCTATCTTGT<br>TGGTCTGTAGGACTGGAGTAATGATTAAGAGGGACA<br>GTCGGGGGCATTCGTATTTTCATTGTCAGAGGT | KT184442.1 | Uncultured eukaryote clone<br>ALA5117773_P02_A09 18S<br>ribosomal RNA gene, partial<br>sequence                  | 100% | 3e-165 | 100% |
|                                                           |          |        |                                                                                                                                                                                                                                                                                                                                                                      | KM870766.1 | Chlamydomonas nivalis strain<br>CCCryo RS_0015-2010 18S<br>ribosomal RNA gene, partial<br>sequence               | 100% | 3e-165 | 100% |
|                                                           | CTTCCAT  | 1,853  | CCAGCTCCAATAGCGTATATTTAAGTTGTTGCAGTTA<br>AAAAGCTCGTAGTTGGATTTTCGGGTGGGTTTCGGTCCG<br>GTCCGCCTCTGGTGTGCACTGATTGAGCCTTCCTTT<br>CTGCCGGGGACGGGTTCTGGGCCCTCACGGTTTGG<br>GACTCGGAGTCGGCGAGGTTACTTTGAGTAAATTAG<br>AGTGTTCAAAGCAAGCCTACGCTCTGAATACATTAG<br>CATGGAATAACGCGATAGGACTCTGGTCTATTGTG<br>TTGGTCTTCGGGACCGGAGTAATGATTAATAGGGAC<br>AGTTGGGGGCATTCGTATTTTCATTGTCAGAGG  | KT184442.1 | Uncultured eukaryote clone<br>ALA5117773_P02_A09 18S<br>ribosomal RNA gene, partial<br>sequence                  | 100% | 4e-148 | 97%  |
|                                                           |          |        |                                                                                                                                                                                                                                                                                                                                                                      | JQ790560.1 | Chlamydomonas nivalis strain<br>CCCryo RS_0015-2010 18S<br>ribosomal RNA gene, partial<br>sequence               | 100% | 4e-148 | 97%  |
|                                                           | TTACCGC  | 1,576  | CCAGCTCCAATAGCGTATATTTAAGTTGTTGCAGTTA<br>AAAAGCTCGTAGTTGGATTTTCGGGTGGGTTTGGTCCG<br>GTCCGCCTCTGGTGTGCACTGACTGAGCGTACCTTT<br>CTGCCGGGGACGGGTTCTGGGCCCTCACGGTCTGG<br>GACTCGGAGTCGGCGAGGTTACTTTGAGTAAATTTAG<br>AGTGTTCAAAGCAAGCCTACGCTCTGAATACATTAG<br>CATGGAATAACGCGATAGGACTCTGGCCTATCTTGT<br>TGGTCTGTAGGACCGGAGTAATGATTAAGAGGGACA<br>GTCGGGGGCATTCGTATTTTCATTGTCAGAGGT | GU117586.1 | Ploeotila sp. CCCryo086-99 strain<br>CCCryo 086a-99 18S small<br>subunit ribosomal RNA gene,<br>partial sequence | 100% | 3e-160 | 99%  |
|                                                           |          |        |                                                                                                                                                                                                                                                                                                                                                                      | KM870694.1 | Uncultured eukaryote clone<br>TE201E 18S ribosomal RNA gene,<br>complete sequence                                | 100% | 5e-157 | 98%  |
|                                                           |          |        |                                                                                                                                                                                                                                                                                                                                                                      | JQ790560.1 | Chlamydomonas nivalis strain<br>CCCryo RS_0015-2010 18S<br>ribosomal RNA gene, partial<br>sequence               | 100% | 2e-156 | 98%  |
|                                                           | TAAATCGC | 977    | CCAGCTCCAATAGCGTATATTTAAGTTGTTGCAGTTA<br>AAAAGCTCGTAGTTGGATTTTCGGGTGGGTTTGGTCCG<br>GTCCGCCTCTGGTGTGCACTGACTGAGCGTACCTTT<br>CTGCCGGGGACGGGTTCTGGGCCCTTACGGTCTGG<br>GACTCGGAGTCGGCGAGGTTACTTTGAGTAAATTTAG<br>AGTGTTCAAAGCAAGCCTACGCTCTGAATACATTAG<br>CATGGAATAACGCGATAGGACTCTGGCCTATCTTGT<br>TGGTCTGTAGGACCGGAGTAATGATTAAGAGGGACA<br>GTCGGGGGCATTCGTATTTTCATTGTCAGAGGT | GU117586.1 | Ploeotila sp. CCCryo086-99 strain<br>CCCryo 086a-99 18S small<br>subunit ribosomal RNA gene,<br>partial sequence | 100% | 5e-157 | 98%  |
|                                                           |          |        |                                                                                                                                                                                                                                                                                                                                                                      | KM870694.1 | Uncultured eukaryote clone<br>TE201E 18S ribosomal RNA gene,<br>complete sequence                                | 100% | 1e-153 | 98%  |
|                                                           |          |        |                                                                                                                                                                                                                                                                                                                                                                      | JQ790560.1 | Chlamydomonas nivalis strain<br>CCCryo RS_0015-2010 18S<br>ribosomal RNA gene, partial<br>sequence               | 100% | 3e-150 | 97%  |



|         |     |                                                                                                                                                                                                                                                                                                                                                                    |            |                                                                                                    |      |        |      |
|---------|-----|--------------------------------------------------------------------------------------------------------------------------------------------------------------------------------------------------------------------------------------------------------------------------------------------------------------------------------------------------------------------|------------|----------------------------------------------------------------------------------------------------|------|--------|------|
| CTTCTTT | 583 | CCAGCTCCAATAGCGTATATTTAAGTTGTTGCAGTTA<br>AAAAGCTCGTAGTTGGATTTCCGGGTGGGTTCCGGTCCG<br>GTCCGCCTCTGGTGTGCACTGATTGAGCCTTCCTTT<br>CTGCCGGGGACGGGTTCCGGGCTCACGGTTTGG<br>GACTCGGAGTCGGCGAGGTTACTTTGAGTAAATTAG<br>AGTGTTCAAAGCAAGCCTACGCTCTGAATACATTAG<br>CATGGAATAACGCGATAGGACTCTGGCCTATCTTGT<br>TGGTCTGTAGGACTGGAGTAATGATTAATAGGGACA<br>GTTGGGGGCATTCGTATTTTCATTGTCAGAGGT | KT184442.1 | Uncultured eukaryote clone<br>ALA5117773_P02_A09 18S<br>ribosomal RNA gene, partial<br>sequence    | 100% | 5e-162 | 99%  |
|         |     |                                                                                                                                                                                                                                                                                                                                                                    | JQ790560.1 | Chlamydomonas nivalis strain<br>CCCryo RS_0015-2010 18S<br>ribosomal RNA gene, partial<br>sequence | 100% | 5e-162 | 99%  |
| CTACTGC | 491 | CCAGCTCCAATAGCGTATATTTAAGTTGTTGCAGTTA<br>AAAAGCTCGTAGTTGGATTTCCGGGTGGGCTCGGTC<br>GGTCCGCCTCTGGTGTGCACTGATTGAGCCTATCTT<br>TCTGCCGGGGACGGGTTCCGGGCTCACGGTTTGG<br>GGACTCGGAGTCGGCGAGGTTACTTTGAGTAAATTA<br>GAGTGTTCAAAGCAAGCCTACGCTCTGAATACATTA<br>GCATGGAATAACGCGATAGGACTCTGGCCTATCTTG<br>TTGGTCTGTAGGACTGGAGTAATGATTAAGAGGGAC<br>AGTCGGGGGCATTCGTATTTTCATTGTCAGAGGT  | KT184442.1 | Uncultured eukaryote clone<br>ALA5117773_P02_A09 18S<br>ribosomal RNA gene, partial<br>sequence    | 100% | 3e-160 | 99%  |
|         |     |                                                                                                                                                                                                                                                                                                                                                                    | JQ790560.1 | Chlamydomonas nivalis strain<br>CCCryo RS_0015-2010 18S<br>ribosomal RNA gene, partial<br>sequence | 100% | 3e-160 | 99%  |
|         |     |                                                                                                                                                                                                                                                                                                                                                                    | JQ790560.1 | Chlamydomonas nivalis strain<br>CCCryo RS_0015-2010 18S<br>ribosomal RNA gene, partial<br>sequence | 100% | 3e-165 | 100% |
| CTTCTGT | 440 | CCAGCTCCAATAGCGTATATTTAAGTTGTTGCAGTTA<br>AAAAGCTCGTAGTTGGATTTCCGGGTGGGTTCCGGTCCG<br>GTCCGCCTCTGGTGTGCACTGATTGAGCCTTCCTTT<br>CTGCCGGGGACGGGTTCCGGGCTCACGGTTTGG<br>GACTCGGAGTCGGCGAGGTTACTTTGAGTAAATTAG<br>AGTGTTCAAAGCAAGCCTACGCTCTGAATACATTAG<br>CATGGAATAACGCGATAGGACTCTGGCCTATCTTGT<br>TGGTCTGTAGGACTGGAGTAATGATTAAGAGGGACA<br>GTTGGGGGCATTCGTATTTTCATTGTCAGAGGT | KT184442.1 | Uncultured eukaryote clone<br>ALA5117773_P02_A09 18S<br>ribosomal RNA gene, partial<br>sequence    | 100% | 1e-163 | 99%  |
|         |     |                                                                                                                                                                                                                                                                                                                                                                    | JQ790560.1 | Chlamydomonas nivalis strain<br>CCCryo RS_0015-2010 18S<br>ribosomal RNA gene, partial<br>sequence | 100% | 1e-163 | 99%  |
| TTTCTGC | 427 | CCAGCTCCAATAGCGTATATTTAAGTTGTTGCAGTTA<br>AAAAGCTCGTAGTTGGATTTGGGTTGGTGTGGTCCG<br>GTCCGCCTCTGGTGTGCACTGATTGAGCCTTCCTTT<br>CTGCCGGGGACGGGTTCCGGGCTCACGGTTTGG<br>GACTCGGAGTCGGCGAGGTTACTTTGAGTAAATTAG<br>AGTGTTCAAAGCAAGCCTACGCTCTGAATACATTAG<br>CATGGAATAACGCGATAGGACTCTGGCCTATCTTGT<br>TGGTCTGTAGGACTGGAGTAATGATTAAGAGGGACA<br>GTCGGGGGCATTCGTATTTTCATTGTCAGAGGT    | KT184442.1 | Uncultured eukaryote clone<br>ALA5117773_P02_A09 18S<br>ribosomal RNA gene, partial<br>sequence    | 100% | 1e-158 | 99%  |
|         |     |                                                                                                                                                                                                                                                                                                                                                                    | JQ790560.1 | Chlamydomonas nivalis strain<br>CCCryo RS_0015-2010 18S<br>ribosomal RNA gene, partial<br>sequence | 100% | 1e-158 | 99%  |

|         |     |                                                                                                                                                                                                                                                                                                                                                                      |            |                                                                                                                  |      |        |      |
|---------|-----|----------------------------------------------------------------------------------------------------------------------------------------------------------------------------------------------------------------------------------------------------------------------------------------------------------------------------------------------------------------------|------------|------------------------------------------------------------------------------------------------------------------|------|--------|------|
| CTTCCTT | 252 | CCAGCTCCAATAGCGTATATTTAAGTTGTTGCAGTTA<br>AAAAGCTCGTAGTTGGATTTCCGGGTGGGTTCCGGTCCG<br>GTCCGCCTCTGGTGTGCACTGATTGAGCCTTCCTTT<br>CTGCCGGGGACGGGTTCCCTGGGCCACAGGTTTGG<br>GACTCGGAGTCGGCGAGGTTACTTTGAGTAAATTAG<br>AGTGTTCAAAGCAAGCCTACGCTCTGAATACATTAG<br>CATGGAATAACGCGATAGGACTCTGGCCTATCTTGT<br>TGGTCTGTAGGACCGGAGTAATGATTAATAGGGACA<br>GTTGGGGGCATTTCGATTTTCATTGTCAGAGGT | KT184442.1 | Uncultured eukaryote clone<br>ALA5117773_P02_A09 18S<br>ribosomal RNA gene, partial<br>sequence                  | 100% | 3e-160 | 99%  |
|         |     |                                                                                                                                                                                                                                                                                                                                                                      | JQ790560.1 | Chlamydomonas nivalis strain<br>CCCryo RS_0015-2010 18S<br>ribosomal RNA gene, partial<br>sequence               | 100% | 3e-160 | 99%  |
| CTTATGC | 103 | CCAGCTCCAATAGCGTATATTTAAGTTGTTGCAGTTA<br>AAAAGCTCGTAGTTGGATTTCCGGGTGGGTTCCGGTCCG<br>GTCCGCCTCTGGTGTGCACTGATTGAGCCTTCCTTT<br>CTGCCGGGGACGGGTTCCCTGGGCCAACGGTTTGG<br>GACTCGGAGTCGGCGAGGTTACTTTGAGTAAATTAG<br>AGTGTTCAAAGCAAGCCTACGCTCTGAATACATTAG<br>CATGGAATAACGCGATAGGACTCTGGCCTATCTTGT<br>TGGTCTGTAGGACTGGAGTAATGATTAAGAGGGACA<br>GTCGGGGGCATTTCGATTTTCATTGTCAGAGGT | KM870746.1 | Uncultured eukaryote clone<br>TE208H 18S ribosomal RNA<br>gene, complete sequence                                | 100% | 3e-165 | 100% |
|         |     |                                                                                                                                                                                                                                                                                                                                                                      | JQ790560.1 | Chlamydomonas nivalis strain<br>CCCryo RS_0015-2010 18S<br>ribosomal RNA gene, partial<br>sequence               | 100% | 1e-163 | 99%  |
| CTTCCGC | 53  | CCAGCTCCAATAGCGTATATTTAAGTTGTTGCAGTTA<br>AAAAGCTCGTAGTTGGATTTCCGGGTGGGTTCCGGTCCG<br>GTCCGCCTCTGGTGTGCACTGATTGAGCCTTCCTTT<br>CTGCCGGGGACGGGTTCCCTGGGCCACAGGTTTGG<br>GACTCGGAGTCGGCGAGGTTACTTTGAGTAAATTAG<br>AGTGTTCAAAGCAAGCCTACGCTCTGAATACATTAG<br>CATGGAATAACGCGATAGGACTCTGGCCTATCTTGT<br>TGGTCTGTAGGACCGGAGTAATGATTAAGAGGGACA<br>GTCGGGGGCATTTCGATTTTCATTGTCAGAGGT | KT184442.1 | Uncultured eukaryote clone<br>ALA5117773_P02_A09 18S<br>ribosomal RNA gene, partial<br>sequence                  | 100% | 1e-163 | 99%  |
|         |     |                                                                                                                                                                                                                                                                                                                                                                      | JQ790560.1 | Chlamydomonas nivalis strain<br>CCCryo RS_0015-2010 18S<br>ribosomal RNA gene, partial<br>sequence               | 100% | 1e-163 | 99%  |
| TTACCAT | 35  | CCAGCTCCAATAGCGTATATTTAAGTTGTTGCAGTTA<br>AAAAGCTCGTAGTTGGATTTCCGGGTGGGTTTGGTCCG<br>GTCCGCCTCTGGTGTGCACTGACTGAGCGTACCTTT<br>CTGCCGGGGACGGGTTCCCTGGGCCACAGGTTCTGG<br>GACTCGGAGTCGGCGAGGTTACTTTGAGTAAATTAG<br>AGTGTTCAAAGCAAGCCTACGCTCTGAATACATTAG<br>CATGGAATAACGCGATAGGACTCTGGTCTATTGTG<br>TTGGTCTTCGGGACCGGAGTAATGATTAATAGGGAC<br>AGTTGGGGGCATTTCGATTTTCATTGTCAGAGG  | GU117586.1 | Ploeotila sp. CCCryo086-99 strain<br>CCCryo 086a-99 18S small<br>subunit ribosomal RNA gene,<br>partial sequence | 100% | 9e-145 | 96%  |
|         |     |                                                                                                                                                                                                                                                                                                                                                                      | KM870694.1 | Uncultured eukaryote clone<br>TE201E 18S ribosomal RNA gene,<br>complete sequence                                | 100% | 2e-141 | 96%  |
|         |     |                                                                                                                                                                                                                                                                                                                                                                      | JQ790560.1 | Chlamydomonas nivalis strain<br>CCCryo RS_0015-2010 18S<br>ribosomal RNA gene, partial<br>sequence               | 100% | 4e-138 | 95%  |

|         |    |                                                                                                                                                                                                                                                                                                                                                                    |            |                                                                                                                  |      |        |     |
|---------|----|--------------------------------------------------------------------------------------------------------------------------------------------------------------------------------------------------------------------------------------------------------------------------------------------------------------------------------------------------------------------|------------|------------------------------------------------------------------------------------------------------------------|------|--------|-----|
| TTACCGT | 24 | CCAGCTCCAATAGCGTATATTTAAGTTGTTGCAGTTA<br>AAAAGCTCGTAGTTGGATTTGCGGGTGGGTTTGGTCCG<br>GTCCGCCTCTGGTGTGCACTGACTGAGCGTACCTTT<br>CTGCCGGGGACGGGTTCTGGGCCTCACGGTCTGG<br>GACTCGGAGTCGGCGAGGTTACTTTGAGTAATTTAG<br>AGTGTTCAAAGCAAGCCTACGCTCTGAATACATTAG<br>CATGGAATAACGCGATAGGACTCTGGCCTATCTTGT<br>TGGTCTGTAGGACCGGAGTAATGATTAAGAGGGACA<br>GTTGGGGGCATTCGTATTTTCATTGTCAGAGGT | GU117586.1 | Ploeotila sp. CCCryo086-99 strain<br>CCCryo 086a-99 18S small<br>subunit ribosomal RNA gene,<br>partial sequence | 100% | 1e-158 | 99% |
|         |    |                                                                                                                                                                                                                                                                                                                                                                    | KM870694.1 | Uncultured eukaryote clone<br>TE201E 18S ribosomal RNA gene,<br>complete sequence                                | 100% | 3e-155 | 98% |
|         |    |                                                                                                                                                                                                                                                                                                                                                                    | JQ790560.1 | Chlamydomonas nivalis strain<br>CCCryo RS_0015-2010 18S<br>ribosomal RNA gene, partial<br>sequence               | 100% | 6e-152 | 98% |
| TTACCTT | 17 | CCAGCTCCAATAGCGTATATTTAAGTTGTTGCAGTTA<br>AAAAGCTCGTAGTTGGATTTGCGGGTGGGTTTGGTCCG<br>GTCCGCCTCTGGTGTGCACTGACTGAGCGTACCTTT<br>CTGCCGGGGACGGGTTCTGGGCCTCACGGTCTGG<br>GACTCGGAGTCGGCGAGGTTACTTTGAGTAATTTAG<br>AGTGTTCAAAGCAAGCCTACGCTCTGAATACATTAG<br>CATGGAATAACGCGATAGGACTCTGGCCTATCTTGT<br>TGGTCTGTAGGACCGGAGTAATGATTAATAGGGACA<br>GTTGGGGGCATTCGTATTTTCATTGTCAGAGGT | GU117586.1 | Ploeotila sp. CCCryo086-99 strain<br>CCCryo 086a-99 18S small<br>subunit ribosomal RNA gene,<br>partial sequence | 100% | 5e-157 | 98% |
|         |    |                                                                                                                                                                                                                                                                                                                                                                    | KM870694.1 | Uncultured eukaryote clone<br>TE201E 18S ribosomal RNA gene,<br>complete sequence                                | 100% | 1e-153 | 98% |
|         |    |                                                                                                                                                                                                                                                                                                                                                                    | JQ790560.1 | Chlamydomonas nivalis strain<br>CCCryo RS_0015-2010 18S<br>ribosomal RNA gene, partial<br>sequence               | 100% | 3e-150 | 97% |

**Supplementary Figure 1:** The oligotype alignments for each taxon, with oligotype names being derived from the nucleotide variations in the sequence alignment.

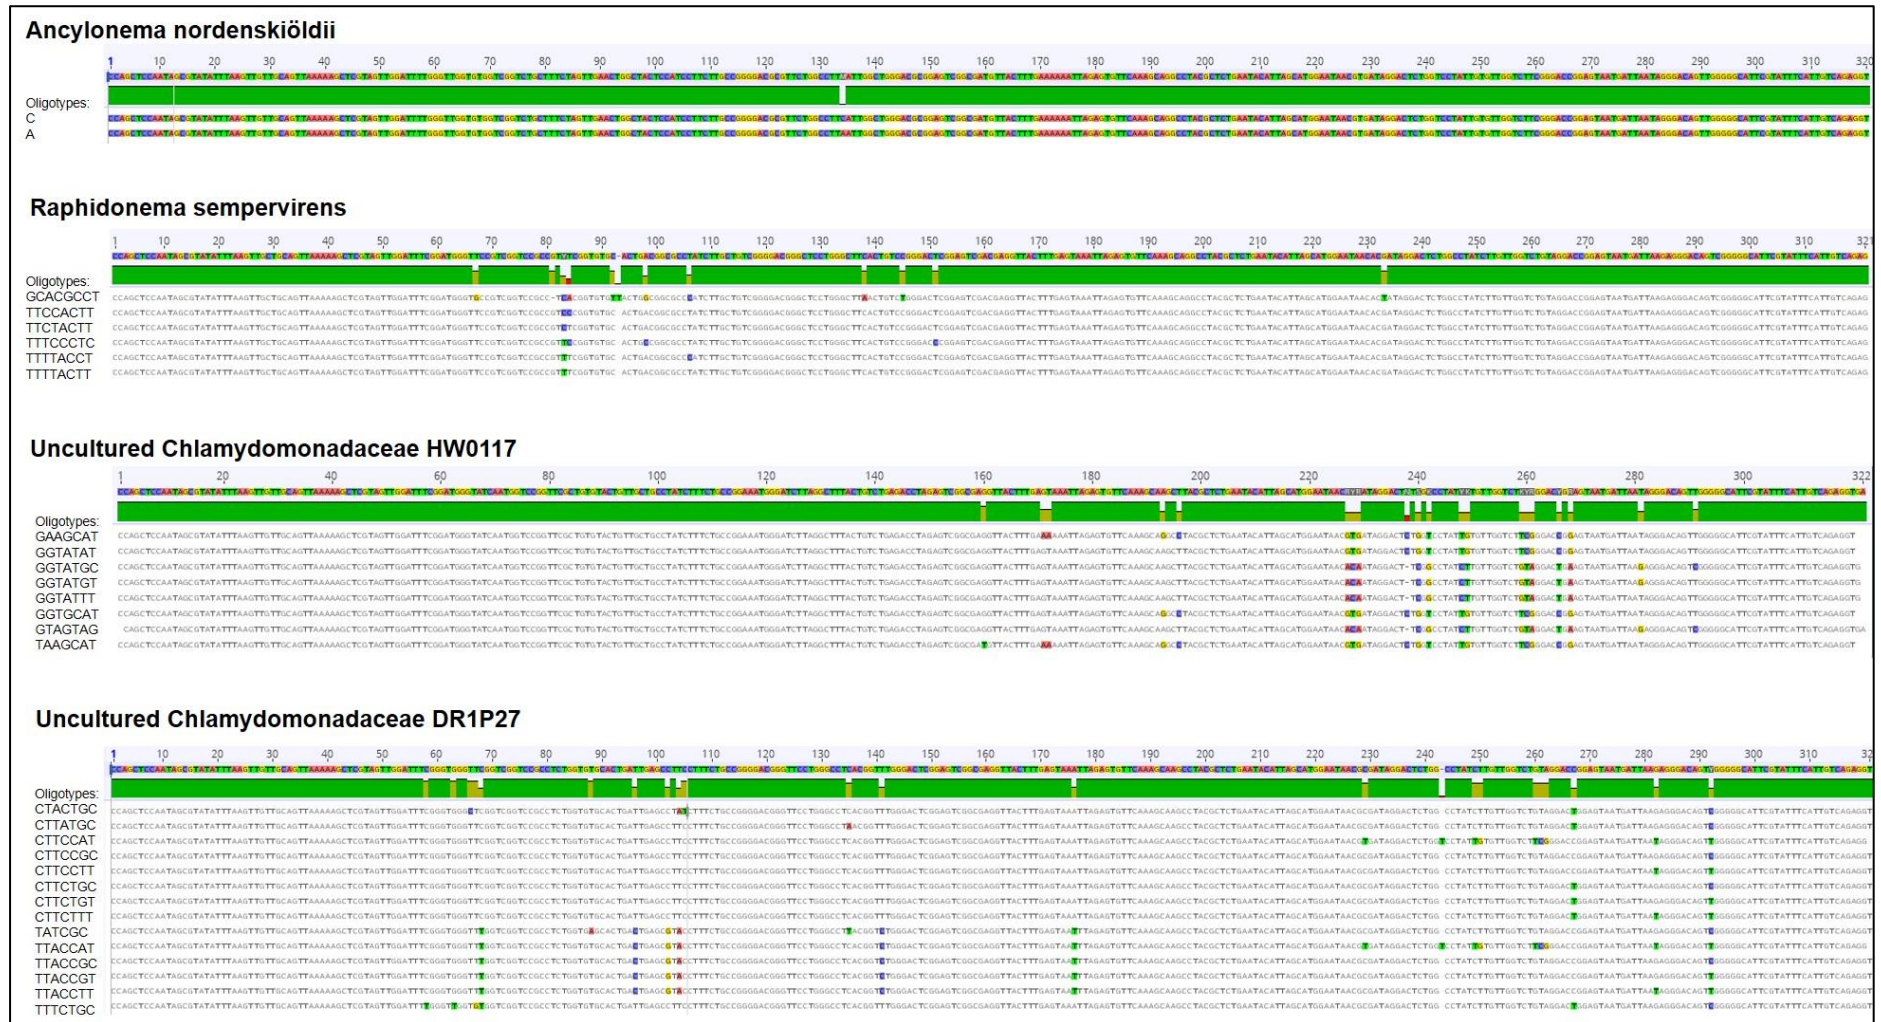

**Supplementary Figure 2:** Daily averaged temperature data for the period between the 1<sup>st</sup> of May and the 31<sup>st</sup> of August 2016 have been obtained from 3 weather stations, which are operating in close proximity to the sampling sites. Data for KAN\_M (3 km away from site 3) and KAN\_U (at site 1a) were provided by the Geological Survey of Denmark and Greenland (GEUS) (53) and data from S6 (2 km away from our base camp) were provided by the Institute for Marine and Atmospheric Research (IMAU) at Utrecht University. Graph shows a progressive decrease in average temperatures from the base camp (S6) to further inland (KAN\_U). Those data can be used as a proxy for the extent of melting.

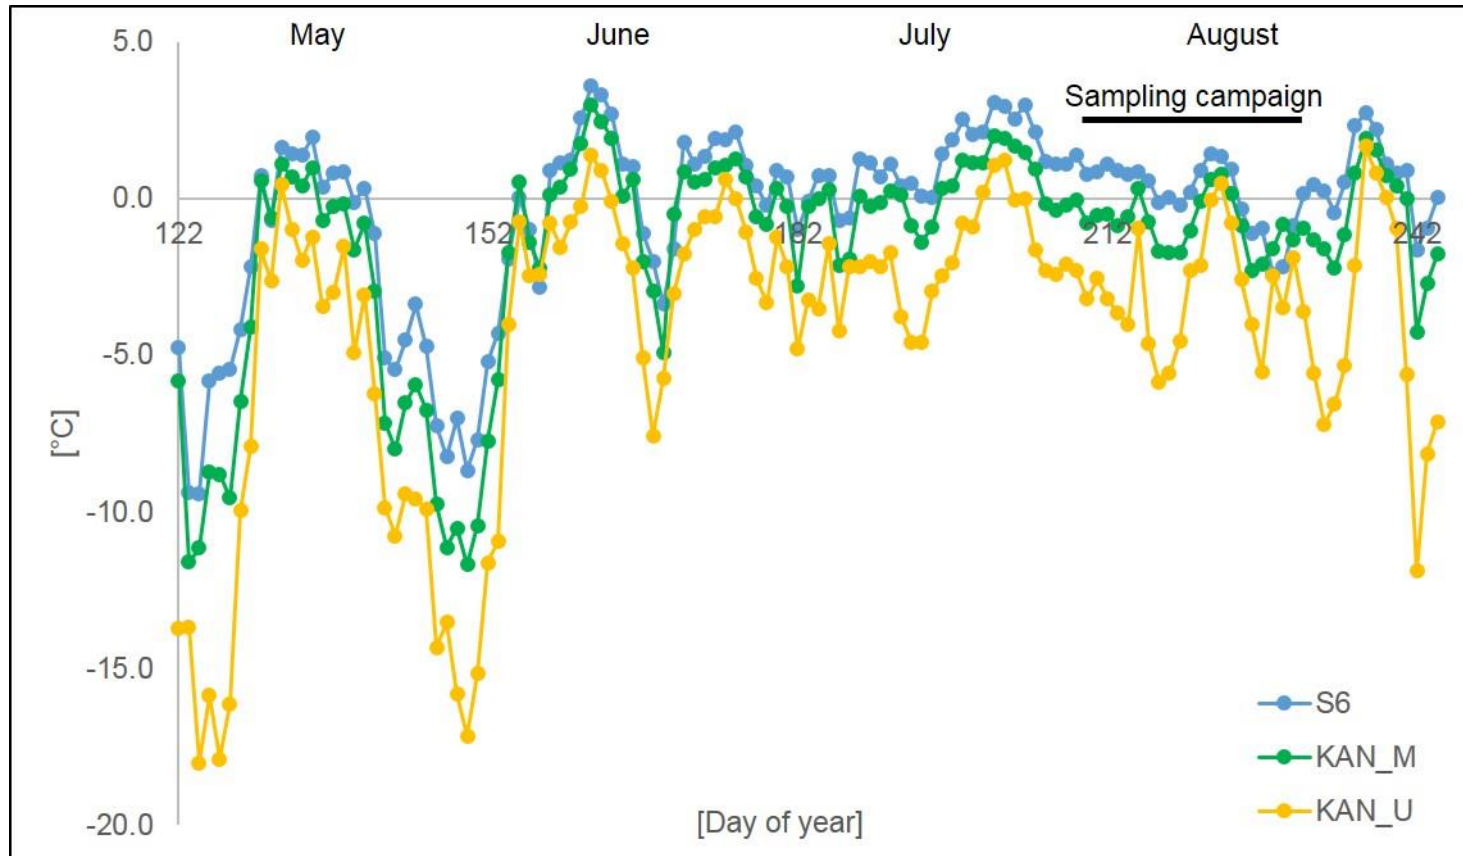

Supplement: mgen-4-159-s001.pdf [file mgen-4-159-s001.pdf]
